# Supplementary material for: Fluoroquinolone Derivatives in the Treatment of Mycobacterium tuberculosis Infection
Source: MDPI journal article supplement (doi:10.3390/ph15101213), 2022-09-30
Supplement: s1 [file s1]

**Table S1.** Antimicrobial activity expressed as MIC and MBC values (μM) for selected Gram-positive and Gram-negative bacterial strains.

| Compound | E.f. ATCC 11420 |        | E.f. ATCC 51299 |        | E. coli ATCC 8739 |        | VISA CIP 106760 |        | S.a. ATCC 6538 |        | S.a. ATCC 43866 |        | S.a. ATCC 700699 |     | S.t. ATCC 13311 |        |
|----------|-----------------|--------|-----------------|--------|-------------------|--------|-----------------|--------|----------------|--------|-----------------|--------|------------------|-----|-----------------|--------|
|          | MIC             | MBC    | MIC             | MBC    | MIC               | MBC    | MIC             | MBC    | MIC            | MBC    | MIC             | MBC    | MIC              | MBC | MIC             | MBC    |
| LEV      | <11.07          | 22.14  | <11.07          | <11.07 | -                 | -      | 354.21          | 708.42 | <11.07         | <11.07 | <11.07          | -      | <11.07           | -   | <11.07          | <11.07 |
| 1        | 287.29          | 574.58 | 287.29          | 287.29 | 35.91             | 71.82  | 574.58          | 574.58 | 143.65         | 287.29 | 143.65          | 574.58 | 143.65           | -   | 71.82           | 143.65 |
| 2        | 278.53          | 557.05 | 139.26          | 278.53 | 69.63             | 69.63  | 278.53          | 557.05 | 139.26         | 139.26 | 139.26          | 278.53 | 139.26           | -   | 69.63           | 69.63  |
| 3        | 67.57           | 135.14 | 67.57           | 135.14 | 135.14            | 135.14 | 67.57           | 135.14 | 67.57          | 67.57  | 33.79           | 67.57  | 67.57            | -   | 135.14          | 270.28 |
| 4        | 32.81           | 16.41  | 32.81           | 32.81  | 131.26            | 131.26 | 16.41           | 32.81  | 16.41          | 32.81  | 16.41           | 32.81  | -                | -   | 65.63           | 262.51 |
| 5        | 31.90           | 127.59 | 15.95           | 63.79  | 127.59            | 510.35 | 15.95           | 510.35 | 15.95          | 31.90  | 15.95           | 31.90  | 15.95            | -   | 255.17          | 510.35 |
| 6        | 62.06           | 496.47 | 31.03           | 248.24 | 248.24            | 496.47 | 31.03           | 496.47 | 15.51          | 496.47 | 31.03           | 248.24 | -                | -   | 248.24          | 496.47 |
| 7        | 120.82          | 241.65 | 15.10           | 120.82 | 241.65            | 483.29 | 241.65          | 483.29 | 30.21          | 483.29 | 15.10           | 483.29 | 120.82           | -   | 241.65          | -      |
| 8        | 235.42          | 470.83 | 117.71          | 470.83 | 117.71            | 470.83 | 235.42          | 470.83 | 58.85          | 470.83 | 117.71          | 470.83 | -                | -   | 235.42          | 470.83 |
| 9        | 229.49          | 458.99 | 114.75          | 458.99 | 458.99            | 458.99 | 229.49          | 458.99 | 57.37          | 458.99 | 57.37           | 458.99 | 229.49           | -   | 229.49          | -      |
| 10       | 437.00          | 437.00 | 218.50          | 437.00 | 437.00            | 437.00 | 218.50          | 437.00 | 437.00         | 437.00 | 109.25          | 437.00 | 218.50           | -   | 452.37          | -      |
| CIP      | <12.07          | 24.14  | <12.07          | <12.07 | -                 | -      | 386.30          | 772.60 | <12.07         | <12.07 | <12.07          | -      | <12.07           | -   | <12.07          | -      |
| 11       | 154.03          | 308.06 | 308.06          | 616.11 | 38.51             | 77.01  | 154.03          | 308.06 | 154.03         | 308.06 | 154.03          | 308.06 | 154.03           | -   | 77.01           | 154.03 |

\*Bacterial strains used: Gram-negative bacteria: *Escherichia coli* (E. coli) ATCC 8739; *Salmonella typhimurium* ATCC 13311; Gram-positive bacteria: *Enterococcus faecalis* (E.f.) ATCC 11420; *Enterococcus faecalis* ATCC 51299; *Escherichia coli* (E. coli) ATCC 8739; Vancomycin-resistant *Staphylococcus aureus* (VISA) CIP 106760; *Staphylococcus aureus* (S.a.) subsp. *aureus* Rosenbach ATCC 6538; *Staphylococcus aureus* subsp. *aureus* Rosenbach ATCC 43866; *Staphylococcus aureus* CIP 106414, ATCC 700699;
