# Supplementary material for: Fluoroquinolone Derivatives in the Treatment of Mycobacterium tuberculosis Infection
Source: MDPI journal article supplement (doi:10.3390/ph15101213), 2022-09-30
Supplement: s1 [file s1]

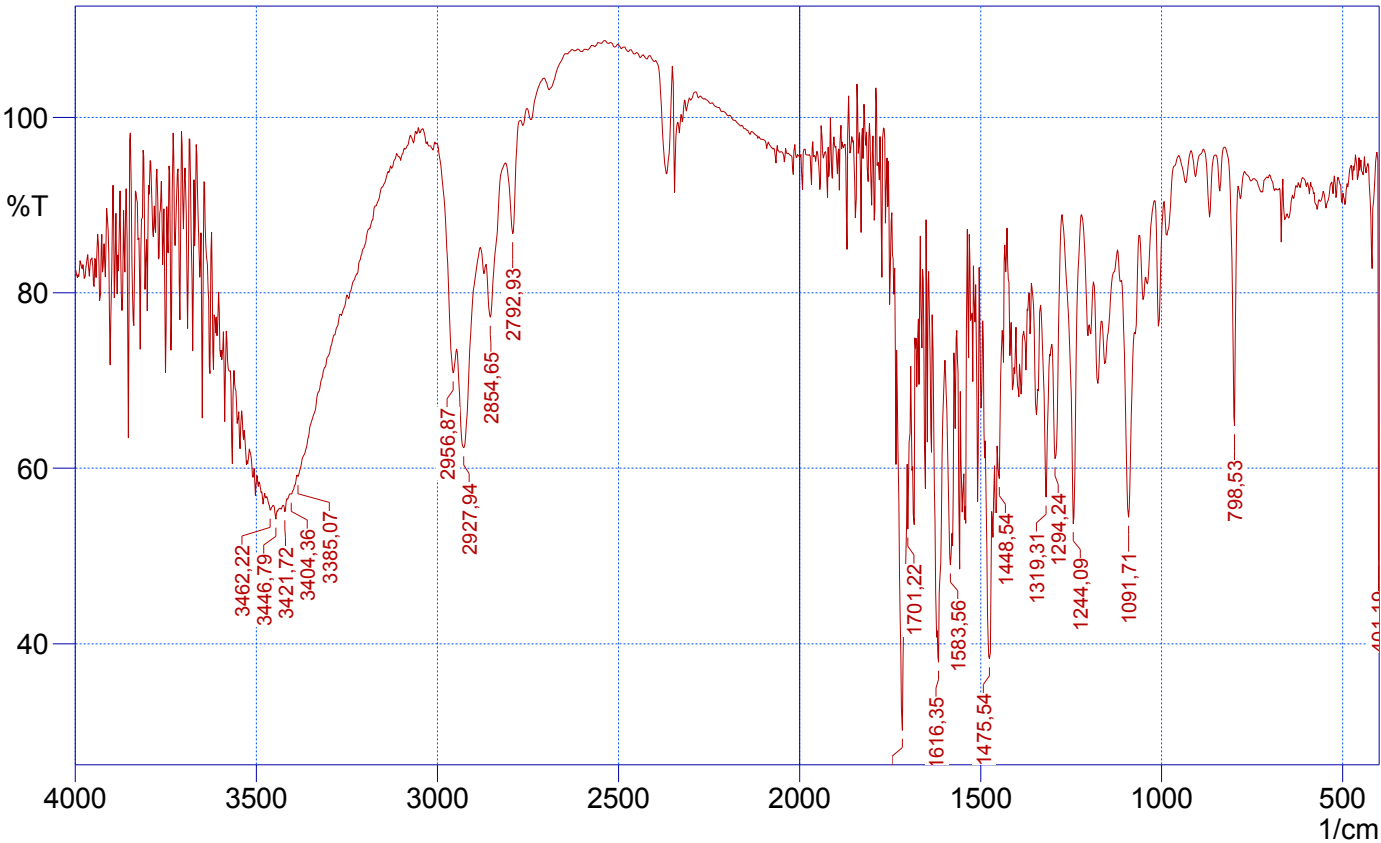

|    | Peak    | Intensity | Corr. Intensity | Base (H) | Base (L) | Area   | Corr. Area |
|----|---------|-----------|-----------------|----------|----------|--------|------------|
| 1  | 401,19  | 47,242    | 23,945          | 403,12   | 399,26   | 1,21   | 0,247      |
| 2  | 798,53  | 64,879    | 28,444          | 825,53   | 788,89   | 2,424  | 1,498      |
| 3  | 1091,71 | 54,451    | 23,618          | 1111     | 1076,28  | 6,161  | 2,449      |
| 4  | 1244,09 | 53,712    | 35,124          | 1274,95  | 1222,87  | 6,468  | 3,793      |
| 5  | 1294,24 | 61,126    | 17,931          | 1303,88  | 1274,95  | 4,083  | 1,463      |
| 6  | 1319,31 | 56,727    | 19,629          | 1334,74  | 1303,88  | 5,043  | 1,397      |
| 7  | 1448,54 | 58,834    | 6,397           | 1452,4   | 1440,83  | 2,04   | 0,159      |
| 8  | 1475,54 | 38,299    | 19,441          | 1487,12  | 1469,76  | 5,994  | 1,952      |
| 9  | 1583,56 | 48,991    | 23,836          | 1598,99  | 1573,91  | 5,916  | 2,453      |
| 10 | 1616,35 | 37,925    | 34,05           | 1631,78  | 1600,92  | 8,868  | 4,445      |
| 11 | 1701,22 | 53,097    | 9,593           | 1703,14  | 1693,5   | 2,024  | 0,342      |
| 12 | 1716,65 | 30,13     | 30,249          | 1730,15  | 1705,07  | 8,868  | 3,289      |
| 13 | 2792,93 | 86,742    | 10,383          | 2812,21  | 2771,71  | 1,271  | 0,773      |
| 14 | 2854,65 | 77,226    | 8,491           | 2866,22  | 2812,21  | 3,549  | 0,774      |
| 15 | 2927,94 | 62,346    | 14,652          | 2947,23  | 2881,65  | 9,075  | 2,424      |
| 16 | 2956,87 | 70,883    | 6,894           | 3001,24  | 2947,23  | 4,279  | 0,331      |
| 17 | 3385,07 | 59,06     | 0,446           | 3387     | 3286,7   | 17,429 | 0,069      |
| 18 | 3404,36 | 57,067    | 0,259           | 3406,29  | 3388,93  | 4,125  | 0,051      |
| 19 | 3421,72 | 55,041    | 1,032           | 3425,58  | 3408,22  | 4,347  | 0,042      |
| 20 | 3446,79 | 54,214    | 1,395           | 3452,58  | 3437,15  | 3,996  | 0,055      |
| 21 | 3462,22 | 55,231    | 0,965           | 3469,94  | 3454,51  | 3,927  | 0,059      |

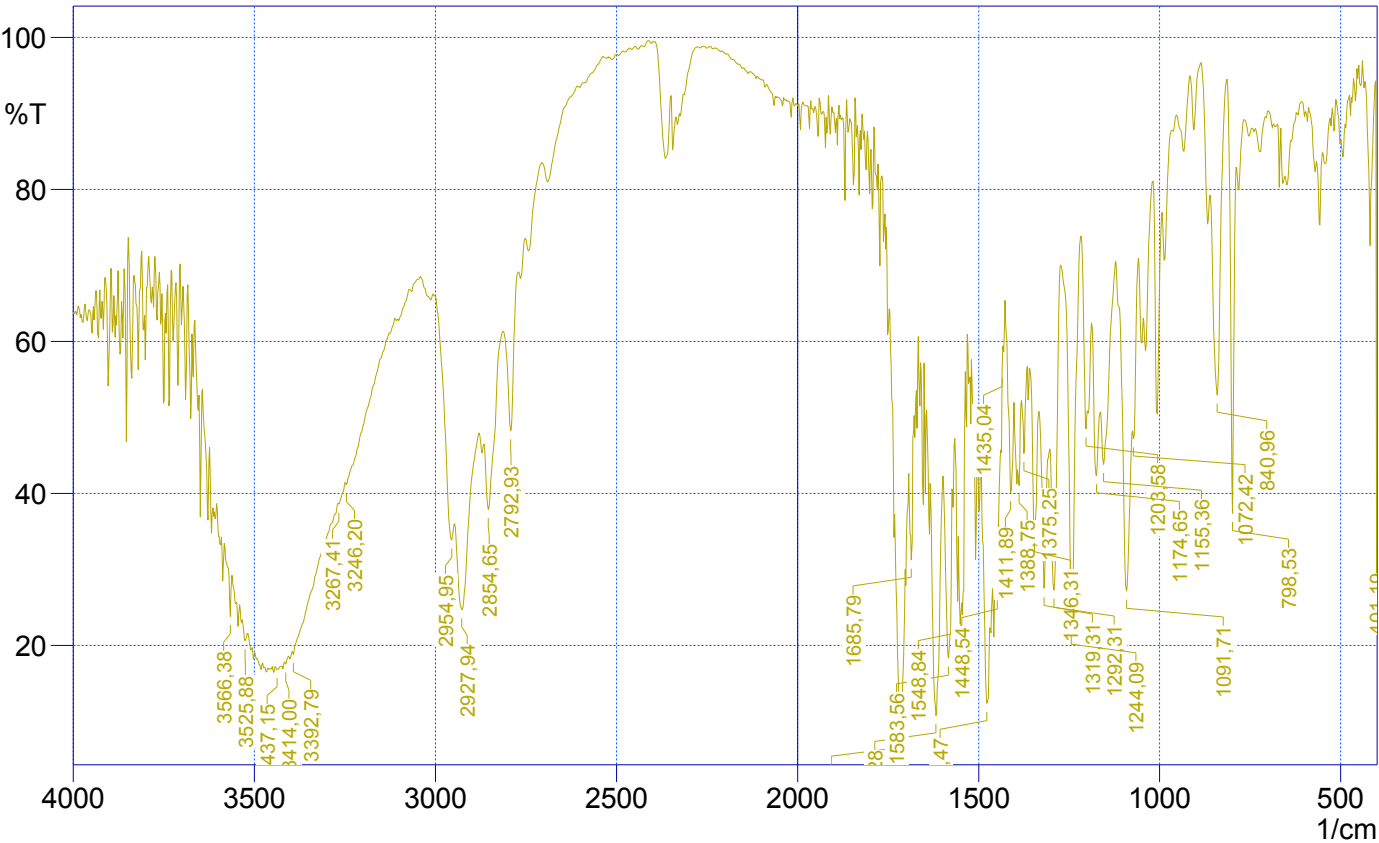

|    | Peak    | Intensity | Corr. Intensity | Base (H) | Base (L) | Area   | Corr. Area |
|----|---------|-----------|-----------------|----------|----------|--------|------------|
| 1  | 401,19  | 31,828    | 31,222          | 403,12   | 399,26   | 1,861  | 0,398      |
| 2  | 798,53  | 37,38     | 49,969          | 813,96   | 788,89   | 4,486  | 3,1        |
| 3  | 840,96  | 52,967    | 32,598          | 860,25   | 813,96   | 6,906  | 3,99       |
| 4  | 1072,42 | 47,209    | 4,115           | 1074,35  | 1060,85  | 3,305  | 0,287      |
| 5  | 1091,71 | 27,138    | 28,175          | 1111     | 1076,28  | 13,973 | 5,006      |
| 6  | 1155,36 | 43,816    | 10,608          | 1163,08  | 1122,57  | 10,62  | 1,702      |
| 7  | 1174,65 | 42,35     | 13,352          | 1186,22  | 1165     | 6,816  | 1,379      |
| 8  | 1203,58 | 48,488    | 7,488           | 1217,08  | 1199,72  | 4,148  | 0,379      |
| 9  | 1244,09 | 22,442    | 49,58           | 1273,02  | 1219,01  | 16,034 | 8,307      |
| 10 | 1292,31 | 27,302    | 26,676          | 1301,95  | 1274,95  | 10,359 | 3,776      |
| 11 | 1319,31 | 27,536    | 20,908          | 1332,81  | 1303,88  | 11,765 | 2,557      |
| 12 | 1346,31 | 34,602    | 18,952          | 1357,89  | 1334,74  | 8,424  | 2,09       |
| 13 | 1375,25 | 45,274    | 8,746           | 1381,03  | 1367,53  | 4,045  | 0,496      |
| 14 | 1388,75 | 41,066    | 5,529           | 1392,61  | 1382,96  | 3,283  | 0,226      |
| 15 | 1411,89 | 40,138    | 13,908          | 1427,32  | 1404,18  | 7,151  | 1,24       |
| 16 | 1435,04 | 45,397    | 3,995           | 1436,97  | 1427,32  | 2,127  | 0          |
| 17 | 1448,54 | 27,087    | 6,472           | 1452,4   | 1440,83  | 5,41   | 0,385      |
| 18 | 1477,47 | 12,364    | 17,062          | 1492,9   | 1469,76  | 16,083 | 4,097      |
| 19 | 1548,84 | 24,04     | 13,856          | 1554,63  | 1537,27  | 9,243  | 2,649      |
| 20 | 1583,56 | 18,343    | 22,341          | 1597,06  | 1573,91  | 13,702 | 4,664      |
| 21 | 1618,28 | 10,766    | 28,666          | 1631,78  | 1598,99  | 22,402 | 9,328      |
| 22 | 1685,79 | 31,251    | 11,889          | 1691,57  | 1680     | 4,909  | 0,769      |
| 23 | 1716,65 | 8,833     | 27,841          | 1730,15  | 1693,5   | 25,522 | 10,064     |
| 24 | 2792,93 | 48,232    | 16,795          | 2812,21  | 2771,71  | 9,588  | 2,092      |
| 25 | 2854,65 | 37,9      | 11,875          | 2866,22  | 2814,14  | 16,499 | 2,493      |
| 26 | 2927,94 | 24,727    | 14,726          | 2947,23  | 2881,65  | 30,438 | 5,475      |
| 27 | 2954,95 | 33,908    | 5,458           | 2999,31  | 2949,16  | 16,576 | 1,026      |
| 28 | 3246,2  | 41,165    | 0,488           | 3248,13  | 3128,54  | 35,125 | 0,084      |
| 29 | 3267,41 | 38,614    | 0,366           | 3269,34  | 3250,05  | 7,719  | 0,08       |
| 30 | 3392,79 | 18,822    | 0,668           | 3394,72  | 3269,34  | 68,41  | 0,047      |
| 31 | 3414    | 17,542    | 0,429           | 3415,93  | 3406,29  | 7,162  | 0,039      |
| 32 | 3437,15 | 16,855    | 0,403           | 3442,94  | 3425,58  | 13,332 | 0,093      |
| 33 | 3525,88 | 20,621    | 1,619           | 3531,66  | 3520,09  | 7,816  | 0,235      |

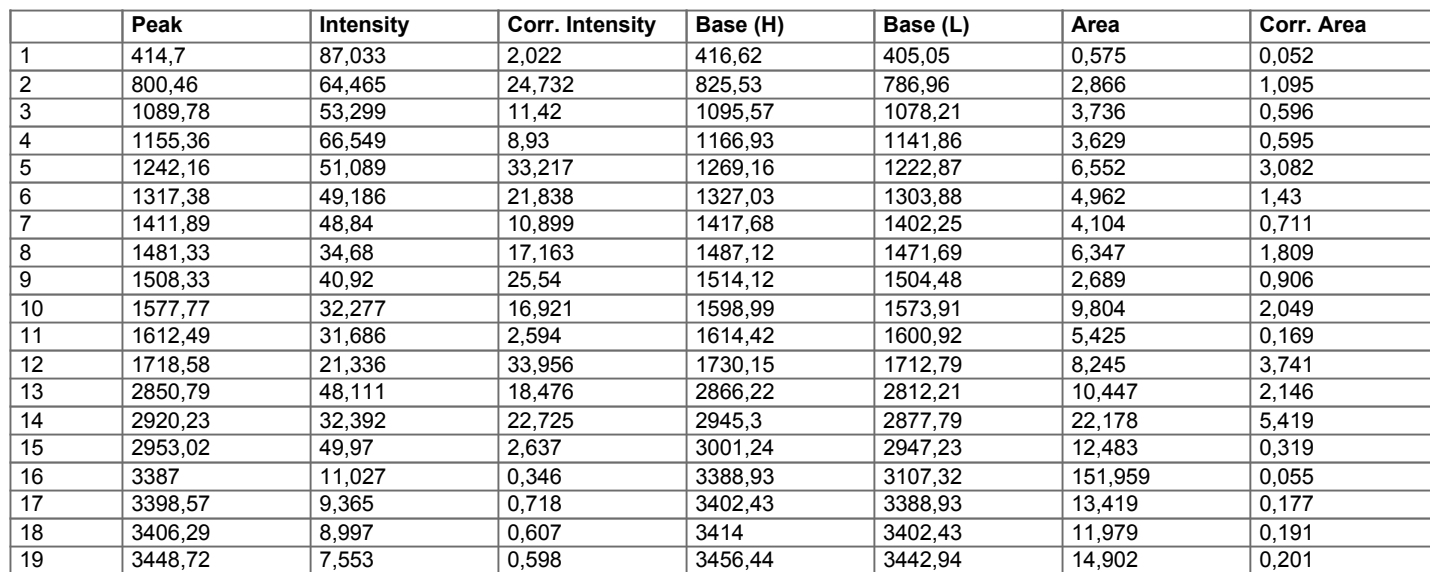

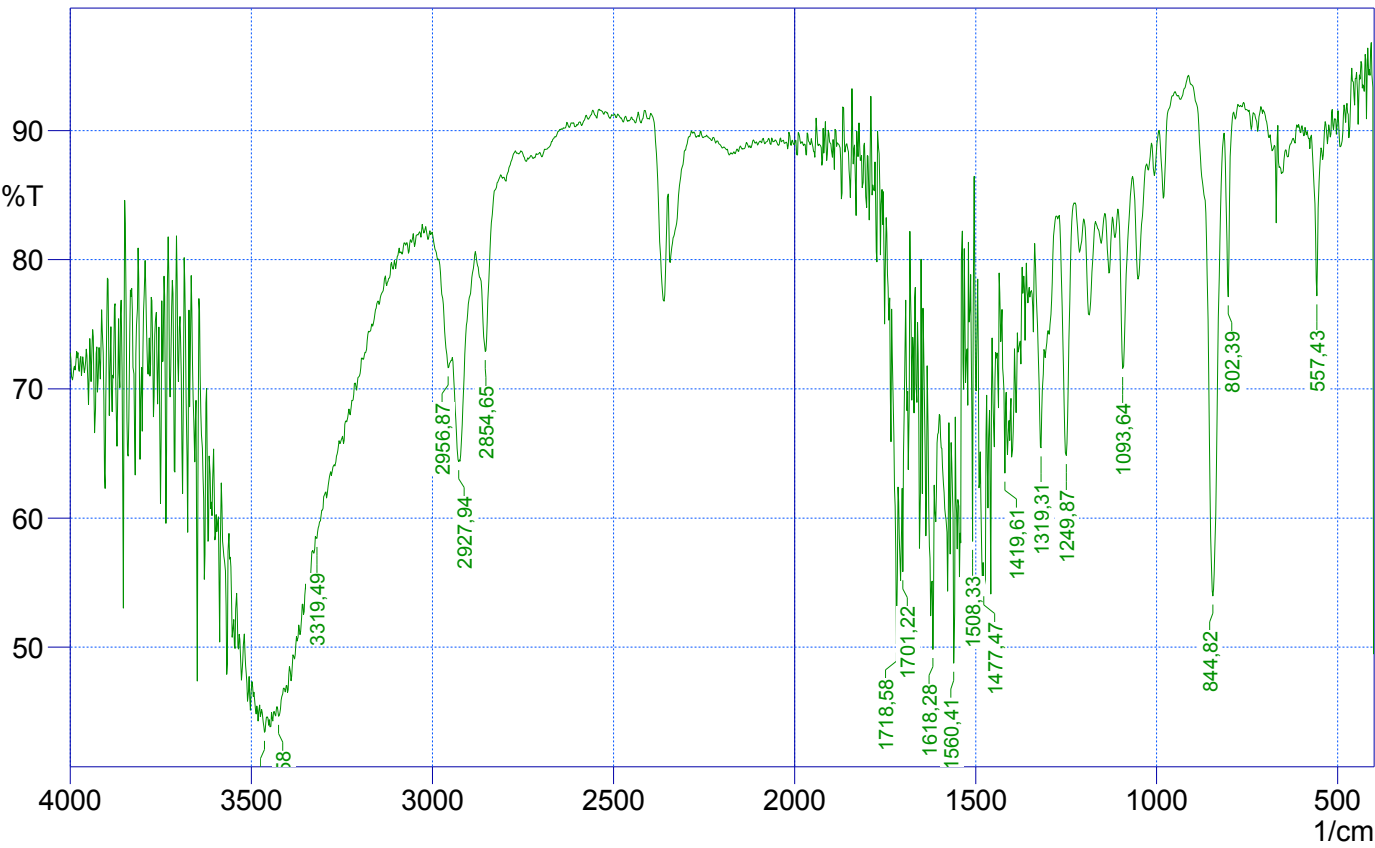

|    | Peak    | Intensity | Corr. Intensity | Base (H) | Base (L) | Area  | Corr. Area |
|----|---------|-----------|-----------------|----------|----------|-------|------------|
| 1  | 557,43  | 77,199    | 11,885          | 572,86   | 545,85   | 1,961 | 0,614      |
| 2  | 802,39  | 77,141    | 13,358          | 813,96   | 786,96   | 1,793 | 0,637      |
| 3  | 844,82  | 53,983    | 36,919          | 912,33   | 815,89   | 9,862 | 6,273      |
| 4  | 1093,64 | 71,587    | 13,166          | 1107,14  | 1066,64  | 4,021 | 1,196      |
| 5  | 1249,87 | 64,85     | 19,006          | 1269,16  | 1224,8   | 5,342 | 1,97       |
| 6  | 1319,31 | 65,455    | 10,107          | 1336,67  | 1311,59  | 3,602 | 0,76       |
| 7  | 1419,61 | 63,478    | 8,383           | 1427,32  | 1415,75  | 1,829 | 0,237      |
| 8  | 1477,47 | 54,62     | 4,52            | 1479,4   | 1469,76  | 2,241 | 0,285      |
| 9  | 1508,33 | 58,22     | 25,186          | 1514,12  | 1504,48  | 1,435 | 0,633      |
| 10 | 1560,41 | 48,761    | 18,396          | 1568,13  | 1556,55  | 2,67  | 0,644      |
| 11 | 1618,28 | 49,84     | 7,744           | 1620,21  | 1614,42  | 1,549 | 0,211      |
| 12 | 1701,22 | 55,86     | 9,351           | 1703,14  | 1693,5   | 1,744 | 0,202      |
| 13 | 1718,58 | 50,268    | 15,185          | 1732,08  | 1714,72  | 3,566 | 0,761      |
| 14 | 2854,65 | 72,9      | 10,034          | 2881,65  | 2812,21  | 6,598 | 1,215      |
| 15 | 2927,94 | 64,367    | 9,872           | 2943,37  | 2883,58  | 8,63  | 1,594      |
| 16 | 2956,87 | 71,626    | 3,157           | 2981,95  | 2945,3   | 4,719 | 0,326      |
| 17 | 3319,49 | 58,442    | 0,581           | 3323,35  | 3305,99  | 3,925 | 0,035      |
| 18 | 3425,58 | 44,654    | 0,797           | 3427,51  | 3412,08  | 5,263 | 0,079      |
| 19 | 3464,15 | 43,417    | 1,333           | 3469,94  | 3458,37  | 4,132 | 0,087      |

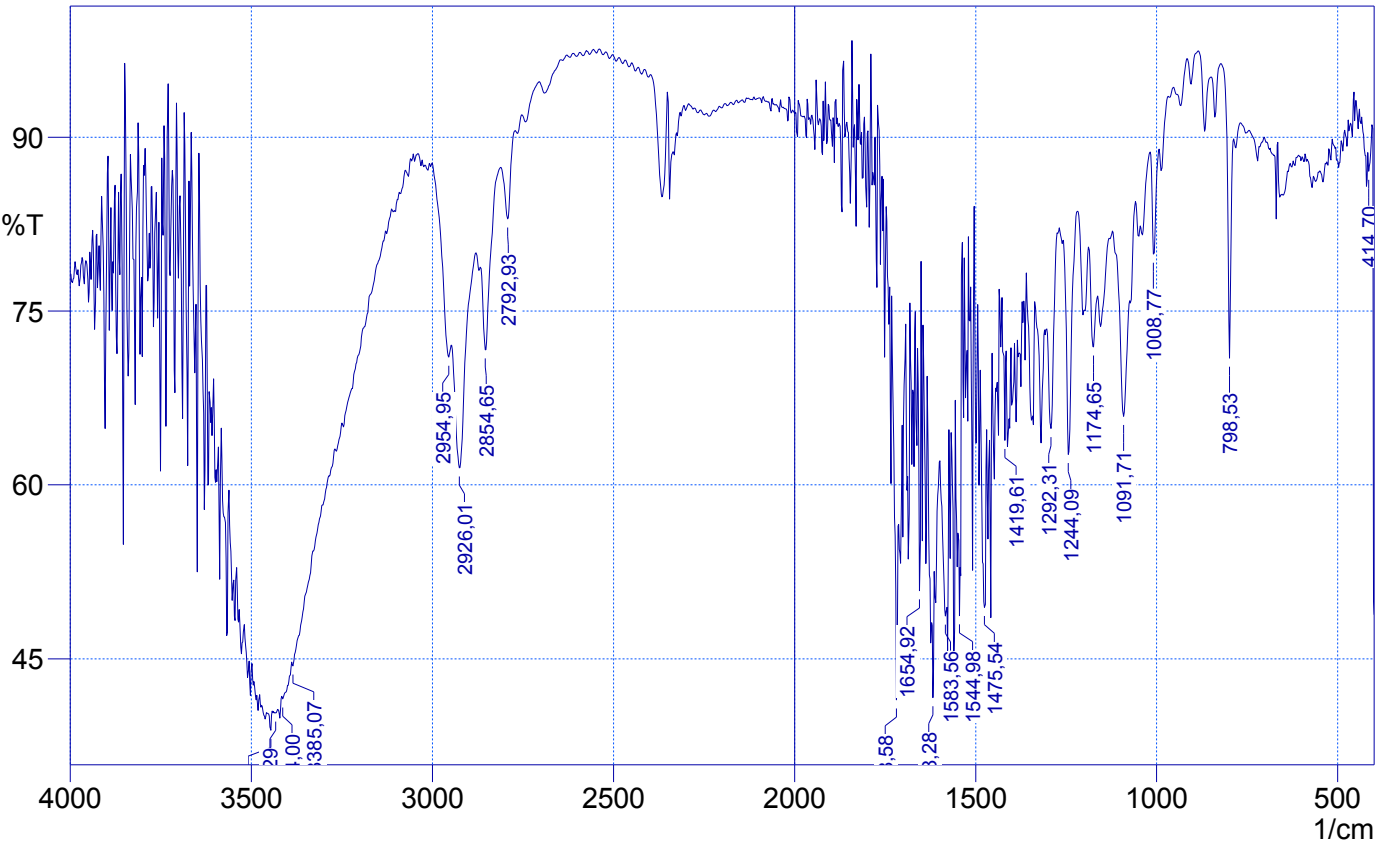

|    | Peak    | Intensity | Corr. Intensity | Base (H) | Base (L) | Area   | Corr. Area |
|----|---------|-----------|-----------------|----------|----------|--------|------------|
| 1  | 414,7   | 87,063    | 1,997           | 416,62   | 405,05   | 0,62   | 0,082      |
| 2  | 798,53  | 70,949    | 20,947          | 823,6    | 786,96   | 2,059  | 0,91       |
| 3  | 1008,77 | 79,913    | 8,902           | 1018,41  | 993,34   | 1,77   | 0,481      |
| 4  | 1091,71 | 65,918    | 11,84           | 1120,64  | 1076,28  | 5,954  | 1,291      |
| 5  | 1174,65 | 71,896    | 6,345           | 1188,15  | 1163,08  | 3,099  | 0,446      |
| 6  | 1244,09 | 62,64     | 19,338          | 1257,59  | 1219,01  | 4,961  | 1,72       |
| 7  | 1292,31 | 64,876    | 11,887          | 1303,88  | 1274,95  | 4,142  | 0,981      |
| 8  | 1419,61 | 63,843    | 9,244           | 1427,32  | 1415,75  | 1,772  | 0,246      |
| 9  | 1475,54 | 49,429    | 17,032          | 1487,12  | 1469,76  | 4,363  | 1,374      |
| 10 | 1544,98 | 48,713    | 5,141           | 1548,84  | 1543,05  | 1,611  | 0,078      |
| 11 | 1583,56 | 48,693    | 3,277           | 1598,99  | 1579,7   | 5,193  | 0,246      |
| 12 | 1618,28 | 41,659    | 8,66            | 1622,13  | 1614,42  | 2,613  | 0,309      |
| 13 | 1654,92 | 50,875    | 25,396          | 1660,71  | 1651,07  | 2,011  | 0,83       |
| 14 | 1718,58 | 41,47     | 21,017          | 1732,08  | 1712,79  | 4,72   | 1,2        |
| 15 | 2792,93 | 82,945    | 5,95            | 2812,21  | 2771,71  | 2,548  | 0,489      |
| 16 | 2854,65 | 71,649    | 8,891           | 2866,22  | 2812,21  | 5,193  | 0,901      |
| 17 | 2926,01 | 61,473    | 13,14           | 2947,23  | 2881,65  | 10,053 | 2,246      |
| 18 | 2954,95 | 71,029    | 2,766           | 3001,24  | 2949,16  | 5,377  | 0,269      |
| 19 | 3385,07 | 44,391    | 0,939           | 3388,93  | 3305,99  | 24,297 | 0,191      |
| 20 | 3414    | 41,534    | 0,427           | 3415,93  | 3388,93  | 9,975  | 0,16       |
| 21 | 3433,29 | 40,321    | 0,248           | 3442,94  | 3427,51  | 6,072  | 0,024      |
| 22 | 3446,79 | 38,828    | 1,602           | 3456,44  | 3442,94  | 5,392  | 0,078      |

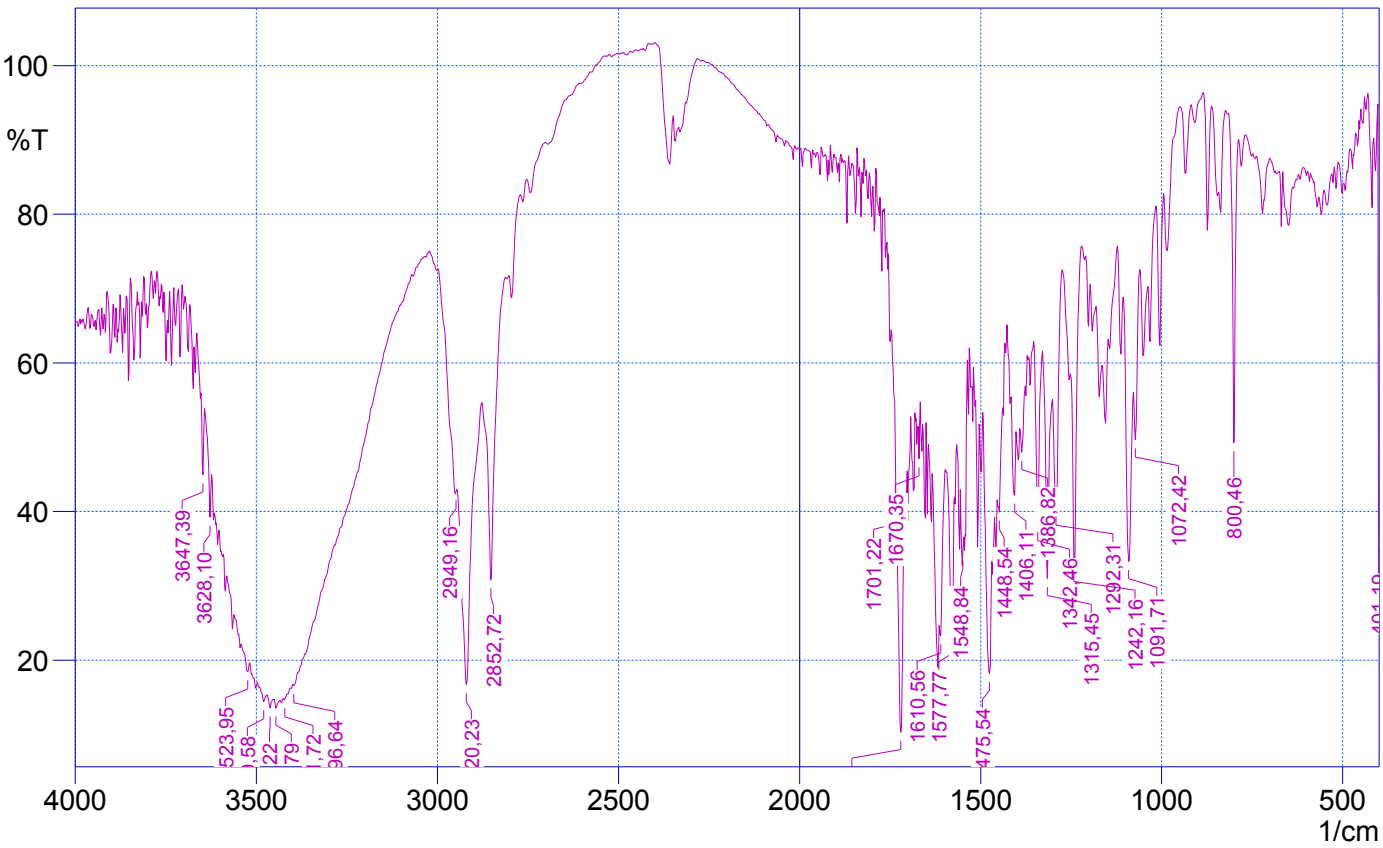

|    | Peak    | Intensity | Corr. Intensity | Base (H) | Base (L) | Area    | Corr. Area |
|----|---------|-----------|-----------------|----------|----------|---------|------------|
| 1  | 401,19  | 33,838    | 30,494          | 403,12   | 399,26   | 1,756   | 0,373      |
| 2  | 800,46  | 49,272    | 42,131          | 815,89   | 788,89   | 3,146   | 2,106      |
| 3  | 1072,42 | 49,656    | 11,902          | 1078,21  | 1060,85  | 3,924   | 0,654      |
| 4  | 1091,71 | 33,321    | 27,952          | 1105,21  | 1080,14  | 8,76    | 3,357      |
| 5  | 1242,16 | 32,905    | 29,92           | 1249,87  | 1222,87  | 7,365   | 2,614      |
| 6  | 1292,31 | 40,501    | 20,816          | 1301,95  | 1274,95  | 7,267   | 2,02       |
| 7  | 1315,45 | 31,011    | 26,815          | 1328,95  | 1303,88  | 8,368   | 2,384      |
| 8  | 1342,46 | 38,428    | 23,284          | 1352,1   | 1330,88  | 6,404   | 1,936      |
| 9  | 1386,82 | 48,001    | 4,662           | 1390,68  | 1379,1   | 3,398   | 0,28       |
| 10 | 1406,11 | 42,207    | 9,882           | 1415,75  | 1402,25  | 4,554   | 0,798      |
| 11 | 1448,54 | 39,947    | 4,932           | 1452,4   | 1440,83  | 3,971   | 0,243      |
| 12 | 1475,54 | 18,221    | 19,785          | 1492,9   | 1469,76  | 13,157  | 4,172      |
| 13 | 1548,84 | 34,643    | 10,91           | 1554,63  | 1537,27  | 7,066   | 1,723      |
| 14 | 1577,77 | 23,261    | 18,808          | 1597,06  | 1573,91  | 10,823  | 2,407      |
| 15 | 1610,56 | 23,312    | 6,583           | 1614,42  | 1598,99  | 7,46    | 0,449      |
| 16 | 1670,35 | 47,141    | 4,999           | 1678,07  | 1668,43  | 2,889   | 0,168      |
| 17 | 1701,22 | 41,107    | 5,816           | 1703,14  | 1693,5   | 3,221   | 0,294      |
| 18 | 1720,5  | 10,305    | 40,39           | 1745,58  | 1705,07  | 20,609  | 8,988      |
| 19 | 2852,72 | 30,846    | 30,453          | 2877,79  | 2814,14  | 18,212  | 5,343      |
| 20 | 2920,23 | 16,743    | 30,554          | 2945,3   | 2879,72  | 30,679  | 10,055     |
| 21 | 2949,16 | 42,683    | 1,452           | 2997,38  | 2947,23  | 12,776  | 0,24       |
| 22 | 3396,64 | 16,604    | 0,474           | 3398,57  | 3105,39  | 121,785 | 0,046      |
| 23 | 3421,72 | 14,723    | 0,444           | 3425,58  | 3408,22  | 14,133  | 0,126      |
| 24 | 3446,79 | 13,597    | 1,084           | 3450,65  | 3437,15  | 11,482  | 0,202      |
| 25 | 3462,22 | 13,578    | 1,442           | 3469,94  | 3454,51  | 13,031  | 0,31       |
| 26 | 3479,58 | 14,464    | 1,313           | 3491,16  | 3471,87  | 15,778  | 0,334      |
| 27 | 3523,95 | 18,458    | 1,646           | 3541,31  | 3520,09  | 14,87   | 0,367      |
| 28 | 3628,1  | 39,234    | 7,564           | 3641,6   | 3624,25  | 5,84    | 0,379      |
| 29 | 3647,39 | 44,959    | 10,807          | 3664,75  | 3643,53  | 5,618   | 0,646      |

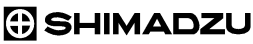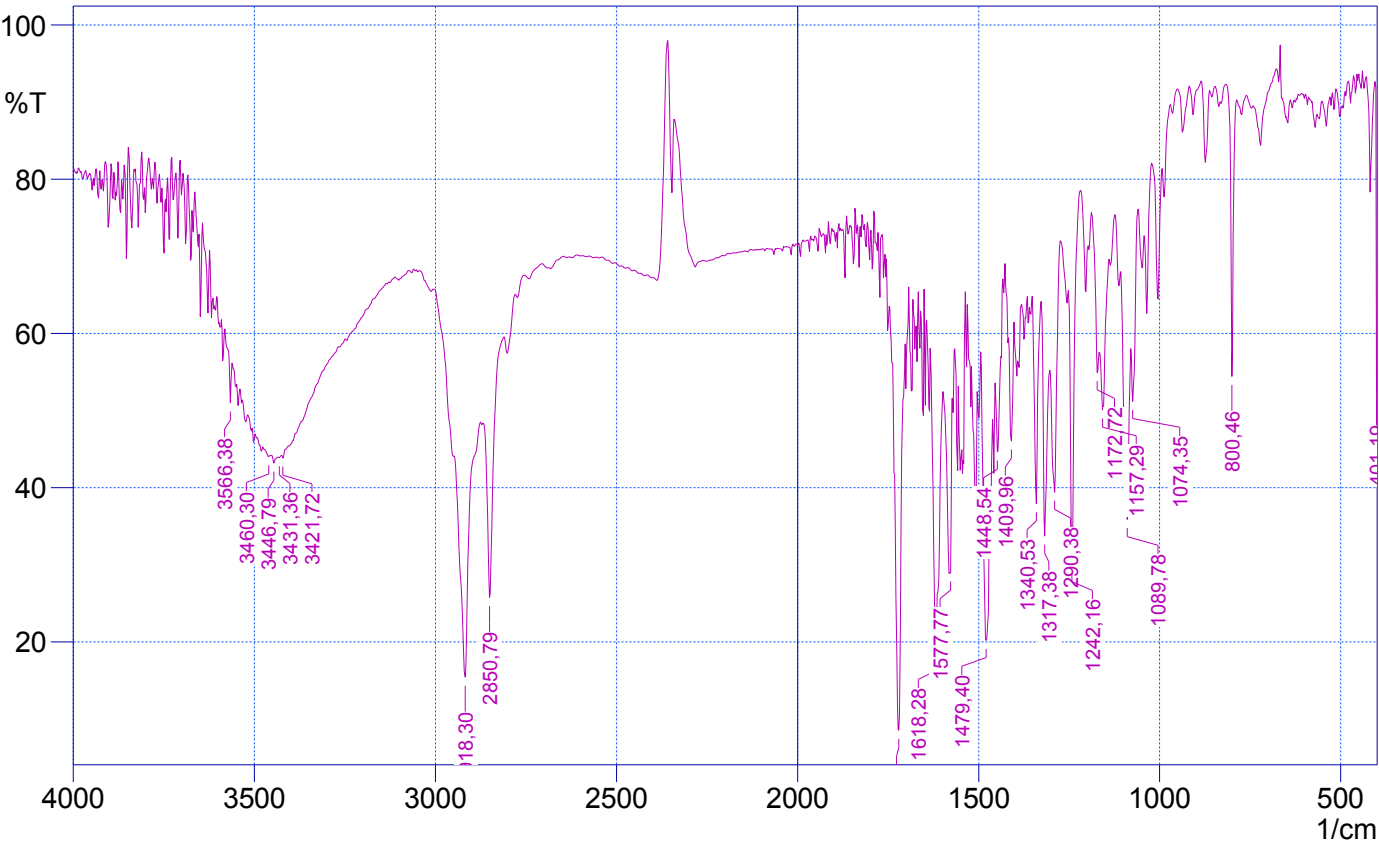

|    | Peak    | Intensity | Corr. Intensity | Base (H) | Base (L) | Area   | Corr. Area |
|----|---------|-----------|-----------------|----------|----------|--------|------------|
| 1  | 401,19  | 49,535    | 21,186          | 403,12   | 399,26   | 1,126  | 0,208      |
| 2  | 800,46  | 54,452    | 36,551          | 815,89   | 788,89   | 2,645  | 1,549      |
| 3  | 1074,35 | 51,213    | 9,984           | 1078,21  | 1060,85  | 3,684  | 0,666      |
| 4  | 1089,78 | 35,902    | 25,696          | 1107,14  | 1080,14  | 8,524  | 3,007      |
| 5  | 1157,29 | 50,069    | 11,062          | 1165     | 1139,93  | 5,799  | 0,888      |
| 6  | 1172,72 | 54,919    | 7,916           | 1186,22  | 1166,93  | 3,925  | 0,339      |
| 7  | 1242,16 | 30,041    | 39,35           | 1251,8   | 1219,01  | 7,909  | 3,28       |
| 8  | 1290,38 | 39,422    | 22,638          | 1301,95  | 1274,95  | 7,682  | 2,328      |
| 9  | 1317,38 | 33,726    | 26,717          | 1327,03  | 1303,88  | 7,713  | 2,437      |
| 10 | 1340,53 | 37,919    | 26,336          | 1352,1   | 1328,95  | 6,623  | 2,169      |
| 11 | 1409,96 | 46,06     | 13,395          | 1415,75  | 1402,25  | 3,873  | 0,871      |
| 12 | 1448,54 | 44,638    | 7,542           | 1452,4   | 1440,83  | 3,655  | 0,496      |
| 13 | 1479,4  | 20,216    | 24,896          | 1492,9   | 1469,76  | 12,55  | 4,525      |
| 14 | 1577,77 | 28,94     | 22,684          | 1597,06  | 1573,91  | 9,525  | 2,889      |
| 15 | 1618,28 | 18,507    | 35,397          | 1631,78  | 1598,99  | 15,615 | 6,734      |
| 16 | 1720,5  | 8,523     | 49,668          | 1745,58  | 1705,07  | 20,188 | 10,855     |
| 17 | 2850,79 | 25,739    | 26,099          | 2868,15  | 2812,21  | 19,285 | 4,323      |
| 18 | 2918,3  | 15,422    | 30,528          | 2949,16  | 2877,79  | 33,712 | 9,81       |
| 19 | 3421,72 | 43,868    | 0,431           | 3423,65  | 3269,34  | 45,004 | 0,108      |
| 20 | 3431,36 | 43,909    | 0,123           | 3435,22  | 3425,58  | 3,437  | 0,006      |
| 21 | 3446,79 | 43,187    | 0,925           | 3452,58  | 3435,22  | 6,234  | 0,054      |
| 22 | 3460,3  | 44,031    | 0,479           | 3469,94  | 3452,58  | 6,149  | 0,046      |
| 23 | 3566,38 | 50,993    | 6,038           | 3581,81  | 3562,52  | 4,818  | 0,269      |

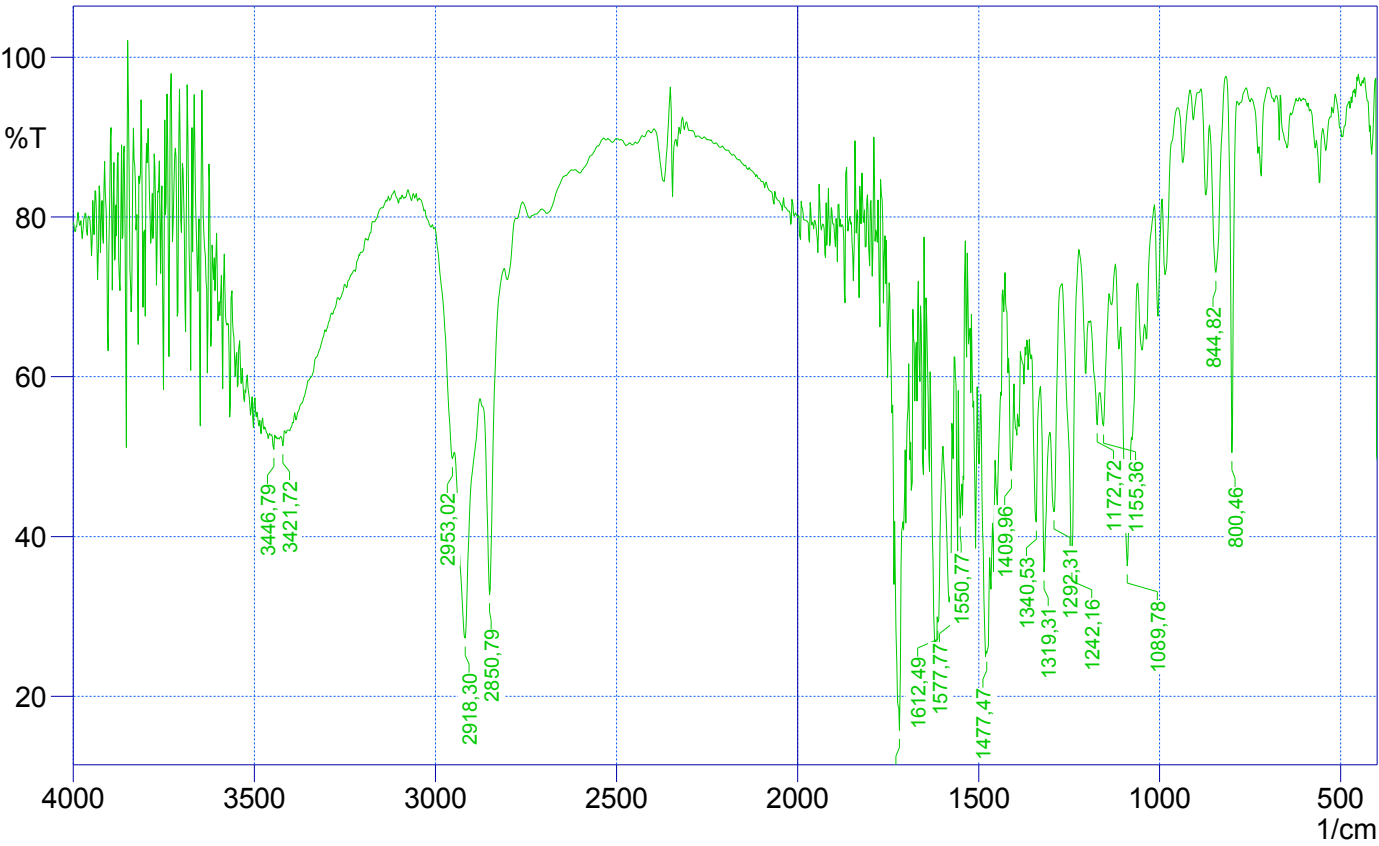

|    | Peak    | Intensity | Corr. Intensity | Base (H) | Base (L) | Area   | Corr. Area |
|----|---------|-----------|-----------------|----------|----------|--------|------------|
| 1  | 800,46  | 50,5      | 45,326          | 817,82   | 786,96   | 2,93   | 2,384      |
| 2  | 844,82  | 73,08     | 20,81           | 862,18   | 817,82   | 3,386  | 2,296      |
| 3  | 1089,78 | 36,355    | 21,587          | 1107,14  | 1078,21  | 9,594  | 2,849      |
| 4  | 1155,36 | 53,858    | 8,907           | 1165     | 1139,93  | 5,613  | 0,735      |
| 5  | 1172,72 | 53,988    | 6,58            | 1192,01  | 1165     | 6,033  | 0,489      |
| 6  | 1242,16 | 36,585    | 37,542          | 1269,16  | 1222,87  | 11,26  | 5,16       |
| 7  | 1292,31 | 43,117    | 15,573          | 1301,95  | 1271,09  | 7,799  | 1,541      |
| 8  | 1319,31 | 35,562    | 21,004          | 1328,95  | 1303,88  | 8,471  | 2,082      |
| 9  | 1340,53 | 41,82     | 18,247          | 1352,1   | 1330,88  | 6,311  | 1,611      |
| 10 | 1409,96 | 48,247    | 12,411          | 1417,68  | 1402,25  | 4,202  | 0,849      |
| 11 | 1477,47 | 25,39     | 17,634          | 1492,9   | 1469,76  | 11,709 | 3,539      |
| 12 | 1550,77 | 42,31     | 12,295          | 1554,63  | 1539,2   | 4,945  | 1,575      |
| 13 | 1577,77 | 31,069    | 22,658          | 1598,99  | 1573,91  | 10,009 | 3,06       |
| 14 | 1612,49 | 29,297    | 3,532           | 1614,42  | 1600,92  | 5,624  | 0,3        |
| 15 | 1718,58 | 15,733    | 22,955          | 1730,15  | 1710,86  | 11,57  | 3,528      |
| 16 | 2850,79 | 32,723    | 28,857          | 2868,15  | 2812,21  | 14,795 | 4,246      |
| 17 | 2918,3  | 27,292    | 26,01           | 2947,23  | 2877,79  | 26,414 | 7,749      |
| 18 | 2953,02 | 49,772    | 2,818           | 3001,24  | 2949,16  | 10,304 | 0,247      |
| 19 | 3421,72 | 51,343    | 1,535           | 3427,51  | 3415,93  | 3,259  | 0,057      |
| 20 | 3446,79 | 50,91     | 1,766           | 3452,58  | 3444,87  | 2,201  | 0,054      |



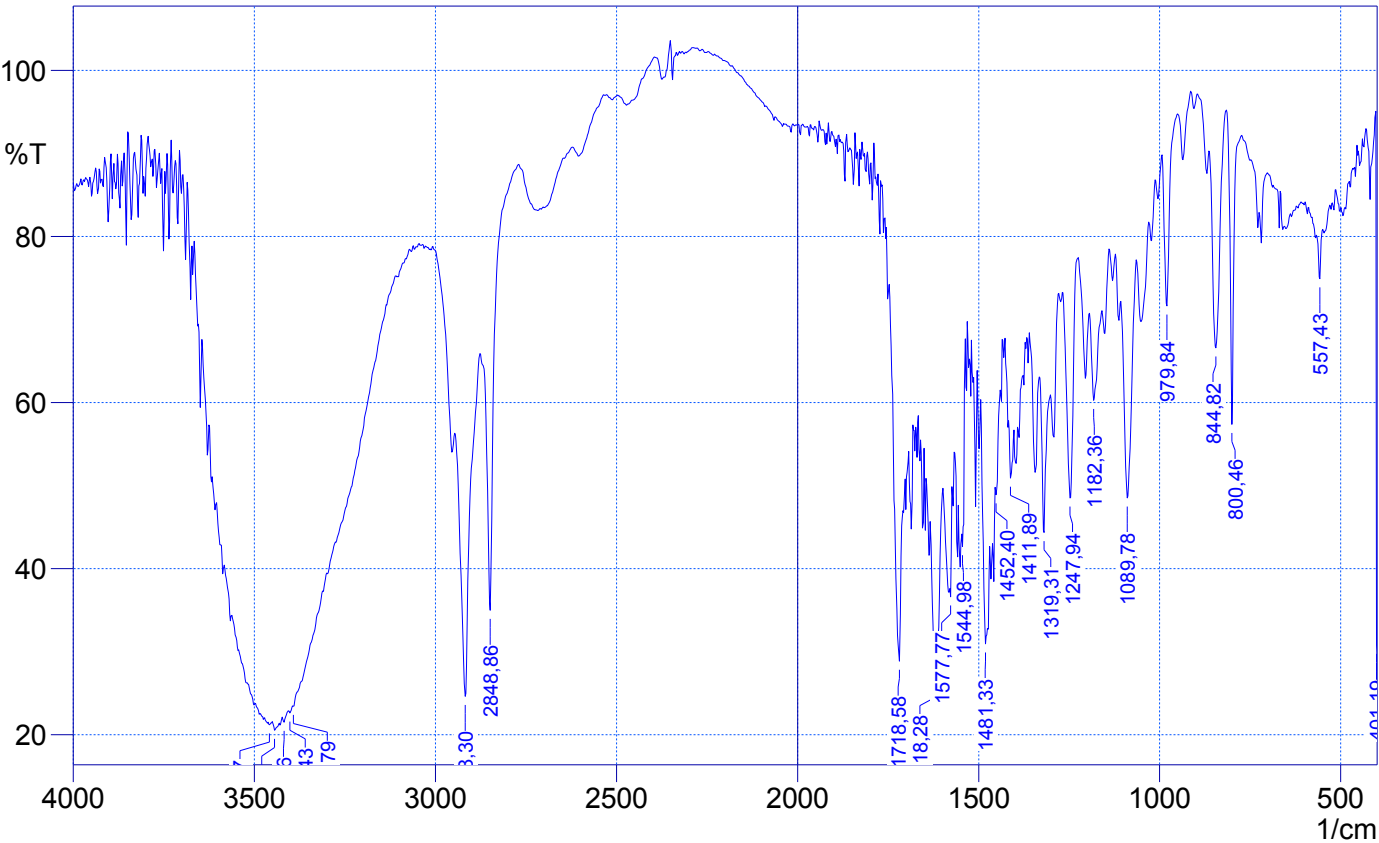

|    | Peak    | Intensity | Corr. Intensity | Base (H) | Base (L) | Area   | Corr. Area |
|----|---------|-----------|-----------------|----------|----------|--------|------------|
| 1  | 401,19  | 29,447    | 32,807          | 403,12   | 399,26   | 2,01   | 0,453      |
| 2  | 557,43  | 74,911    | 5,623           | 567,07   | 549,71   | 1,853  | 0,217      |
| 3  | 800,46  | 57,384    | 36,717          | 815,89   | 773,46   | 3,379  | 2,175      |
| 4  | 844,82  | 66,608    | 25,641          | 864,11   | 815,89   | 4,526  | 2,94       |
| 5  | 979,84  | 71,628    | 19,744          | 993,34   | 950,91   | 2,927  | 1,438      |
| 6  | 1089,78 | 48,525    | 25,689          | 1107,14  | 1064,71  | 9,15   | 3,785      |
| 7  | 1182,36 | 60,266    | 10,576          | 1193,94  | 1159,22  | 6,328  | 1,141      |
| 8  | 1247,94 | 48,523    | 26,639          | 1267,23  | 1226,73  | 8,352  | 3,37       |
| 9  | 1319,31 | 44,381    | 17,589          | 1330,88  | 1303,88  | 7,202  | 1,54       |
| 10 | 1411,89 | 50,916    | 6,465           | 1417,68  | 1402,25  | 4,151  | 0,412      |
| 11 | 1452,4  | 48,909    | 2,544           | 1454,33  | 1440,83  | 3,544  | 0,171      |
| 12 | 1481,33 | 30,97     | 10,092          | 1494,83  | 1475,54  | 7,706  | 0,922      |
| 13 | 1544,98 | 42,671    | 5,897           | 1546,91  | 1539,2   | 2,448  | 0,412      |
| 14 | 1577,77 | 36,621    | 13,218          | 1598,99  | 1573,91  | 9,56   | 1,964      |
| 15 | 1618,28 | 26,656    | 18,917          | 1631,78  | 1600,92  | 14,237 | 3,844      |
| 16 | 1718,58 | 28,863    | 28,15           | 1745,58  | 1705,07  | 14,365 | 5,153      |
| 17 | 2848,86 | 34,988    | 36,758          | 2875,86  | 2771,71  | 15,522 | 4,471      |
| 18 | 2918,3  | 24,625    | 35,443          | 2945,3   | 2877,79  | 23,215 | 8,714      |
| 19 | 3392,79 | 23,46     | 0,358           | 3394,72  | 3111,18  | 96,749 | 0,02       |
| 20 | 3402,43 | 22,652    | 0,315           | 3404,36  | 3394,72  | 6,152  | 0,035      |
| 21 | 3417,86 | 21,518    | 0,88            | 3423,65  | 3406,29  | 11,347 | 0,122      |
| 22 | 3444,87 | 20,548    | 0,95            | 3450,65  | 3433,29  | 11,787 | 0,175      |
| 23 | 3458,37 | 21,205    | 0,286           | 3462,22  | 3452,58  | 6,469  | 0,026      |

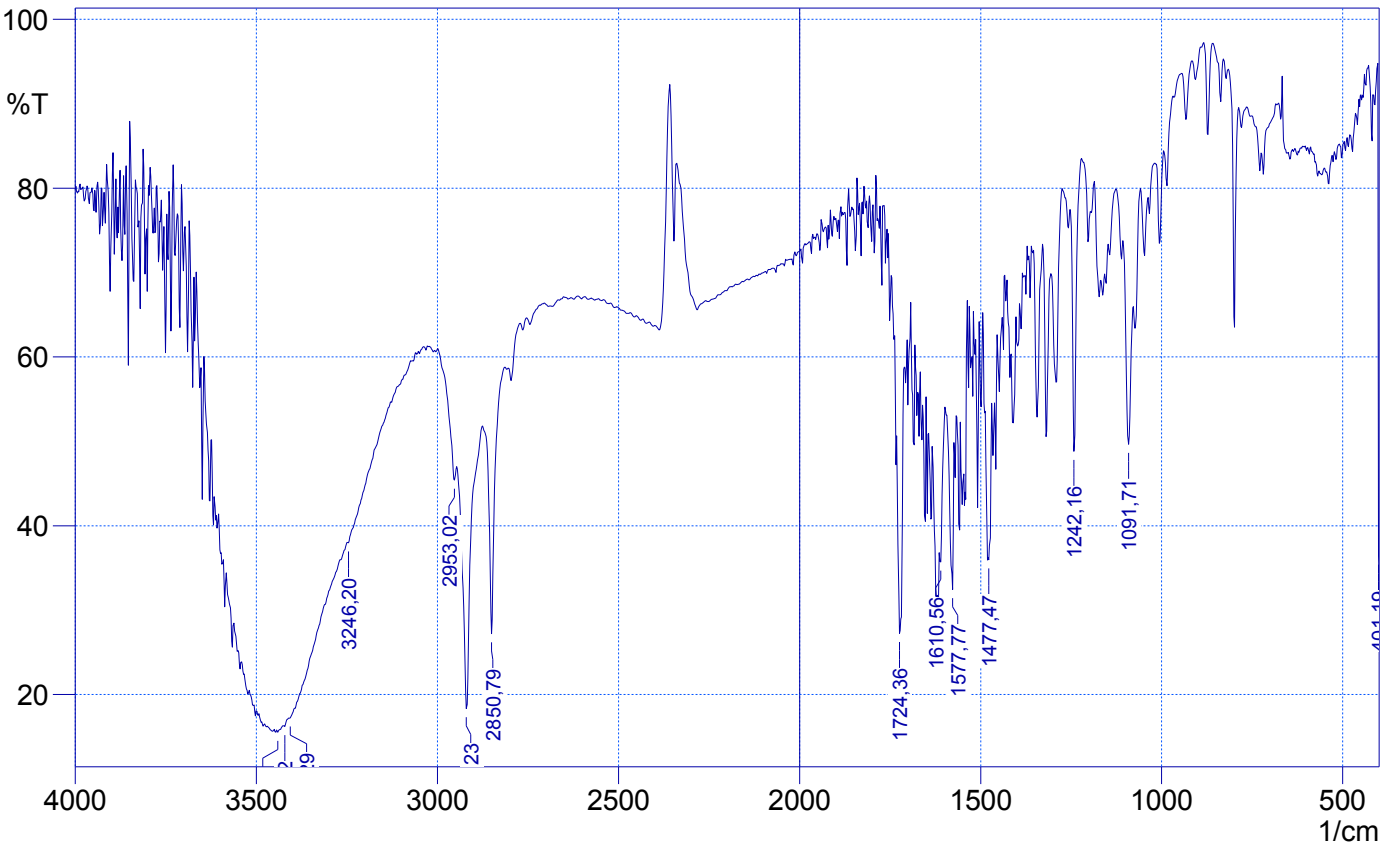

|    | Peak    | Intensity | Corr. Intensity | Base (H) | Base (L) | Area   | Corr. Area |
|----|---------|-----------|-----------------|----------|----------|--------|------------|
| 1  | 401,19  | 34,452    | 30,17           | 403,12   | 399,26   | 1,739  | 0,377      |
| 2  | 1091,71 | 49,66     | 19,567          | 1105,21  | 1080,14  | 5,868  | 1,848      |
| 3  | 1242,16 | 48,814    | 30,633          | 1251,8   | 1222,87  | 4,785  | 2,072      |
| 4  | 1477,47 | 35,971    | 18,136          | 1487,12  | 1469,76  | 6,684  | 2,053      |
| 5  | 1577,77 | 32,45     | 18,016          | 1597,06  | 1573,91  | 8,491  | 1,827      |
| 6  | 1610,56 | 35,71     | 5,398           | 1614,42  | 1598,99  | 5,499  | 0,266      |
| 7  | 1724,36 | 27,25     | 35,119          | 1745,58  | 1712,79  | 11,604 | 5,118      |
| 8  | 2850,79 | 27,232    | 27,495          | 2875,86  | 2816,07  | 19,632 | 4,242      |
| 9  | 2920,23 | 18,345    | 30,264          | 2945,3   | 2877,79  | 28,782 | 8,021      |
| 10 | 2953,02 | 45,405    | 3,15            | 2999,31  | 2947,23  | 14,147 | 0,251      |
| 11 | 3246,2  | 38,006    | 0,303           | 3248,13  | 3130,47  | 39,416 | 0,018      |
| 12 | 3406,29 | 17,221    | 0,253           | 3408,22  | 3250,05  | 90,038 | 0,035      |
| 13 | 3421,72 | 16,219    | 0,244           | 3423,65  | 3412,08  | 8,965  | 0,018      |
| 14 | 3441,01 | 15,534    | 0,387           | 3444,87  | 3427,51  | 13,864 | 0,085      |

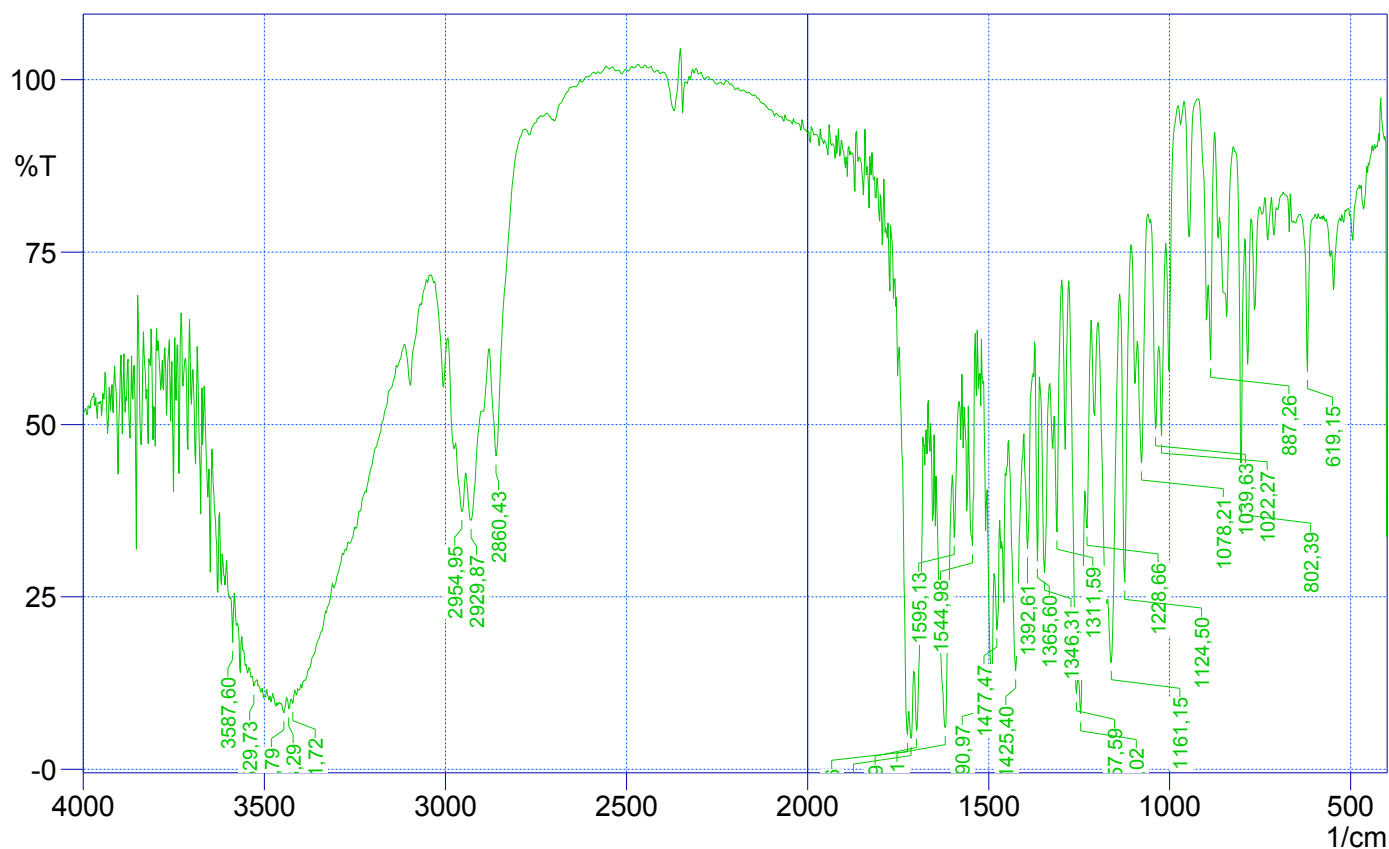

|    | Peak    | Intensity | Corr. Intensity | Base (H) | Base (L) | Area   | Corr. Area |
|----|---------|-----------|-----------------|----------|----------|--------|------------|
| 1  | 619,15  | 57,743    | 22,437          | 638,44   | 603,72   | 4,524  | 1,199      |
| 2  | 802,39  | 39,453    | 41,619          | 823,6    | 792,74   | 4,592  | 2,166      |
| 3  | 887,26  | 59,329    | 18,254          | 893,04   | 875,68   | 2,324  | 0,69       |
| 4  | 1022,27 | 48,376    | 18,928          | 1029,99  | 1010,7   | 4,1    | 1,009      |
| 5  | 1039,63 | 49,401    | 18,709          | 1051,2   | 1031,92  | 4,299  | 1,123      |
| 6  | 1078,21 | 44,459    | 23,908          | 1087,85  | 1060,85  | 6,141  | 2,162      |
| 7  | 1124,5  | 27,166    | 44,007          | 1136,07  | 1107,14  | 8,661  | 4,557      |
| 8  | 1161,15 | 15,492    | 22,161          | 1170,79  | 1138     | 16,05  | 4,005      |
| 9  | 1228,66 | 34,992    | 11,241          | 1232,51  | 1219,01  | 4,643  | 0,769      |
| 10 | 1246,02 | 8,091     | 14,317          | 1251,8   | 1234,44  | 13,32  | 2,828      |
| 11 | 1257,59 | 11,032    | 11,149          | 1278,81  | 1253,73  | 13,838 | 1,265      |
| 12 | 1311,59 | 34,44     | 22,216          | 1317,38  | 1298,09  | 5,579  | 1,451      |
| 13 | 1346,31 | 28,5      | 27,278          | 1357,89  | 1332,81  | 9,587  | 3,23       |
| 14 | 1365,6  | 30,312    | 28,731          | 1371,39  | 1359,82  | 4,406  | 1,723      |
| 15 | 1392,61 | 31,977    | 20,059          | 1402,25  | 1379,1   | 8,455  | 2,055      |
| 16 | 1425,4  | 14,311    | 33,489          | 1444,68  | 1404,18  | 21,929 | 8,949      |
| 17 | 1477,47 | 20,222    | 10,362          | 1483,26  | 1471,69  | 7,171  | 1,271      |
| 18 | 1490,97 | 11,438    | 20,576          | 1504,48  | 1485,19  | 13,571 | 4,361      |
| 19 | 1544,98 | 32,426    | 22,239          | 1554,63  | 1539,2   | 6,331  | 2,115      |
| 20 | 1595,13 | 33,633    | 10,559          | 1598,99  | 1581,63  | 6,302  | 0,758      |
| 21 | 1620,21 | 6,071     | 35,157          | 1643,35  | 1600,92  | 31,839 | 15,465     |
| 22 | 1699,29 | 5,685     | 16,829          | 1705,07  | 1681,93  | 18,809 | 5,761      |
| 23 | 1714,72 | 4,504     | 6,392           | 1720,5   | 1707     | 15,442 | 2,682      |
| 24 | 1724,36 | 5,068     | 6,322           | 1747,51  | 1722,43  | 16,667 | 1,165      |
| 25 | 2860,43 | 45,42     | 21,773          | 2879,72  | 2781,35  | 14,915 | 3,735      |
| 26 | 2929,87 | 36,113    | 9,784           | 2943,37  | 2902,87  | 15,27  | 2,131      |
| 27 | 2954,95 | 37,412    | 6,954           | 2972,31  | 2945,3   | 10,543 | 1,126      |
| 28 | 3421,72 | 9,59      | 1,094           | 3425,58  | 3415,93  | 9,478  | 0,206      |
| 29 | 3433,29 | 8,765     | 1,408           | 3437,15  | 3427,51  | 9,917  | 0,336      |
| 30 | 3446,79 | 8,216     | 1,645           | 3452,58  | 3439,08  | 14,074 | 0,566      |
| 31 | 3529,73 | 12,094    | 1,236           | 3533,59  | 3522,02  | 10,401 | 0,217      |
| 32 | 3587,6  | 18,428    | 7,688           | 3603,03  | 3583,74  | 12,042 | 0,997      |
